# Supplementary material for: The design of an inner-motile waste-energy-driven piezoelectric catalytic system
Source: Royal Society of Chemistry journal article supplement (doi:10.1039/d1nj00993a), 2021-01-01
Supplement: d1nj00993a1.pdf [file d1nj00993a1.pdf]

*New Journal of Chemistry*

**The design of an inner-motile waste-energy-driven  
piezoelectric catalytic system**

Fengping Peng<sup>a,b</sup>, Wanxin Xu<sup>a</sup>, Yunya Hu<sup>a</sup>, Weijie Fu<sup>a</sup>, Haozhen Li<sup>a</sup>, Jingyuan  
Lin<sup>a</sup>, Yafeng Xiao<sup>a</sup>, Zhe Wu<sup>a</sup>, Wei Wang<sup>a,b,\*</sup>, Chunhua Lu<sup>b,\*</sup>

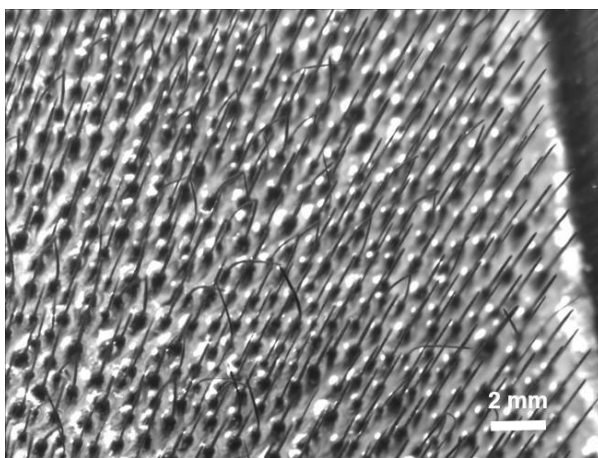

Fig. S1 Optical micrograph of the ZC film.

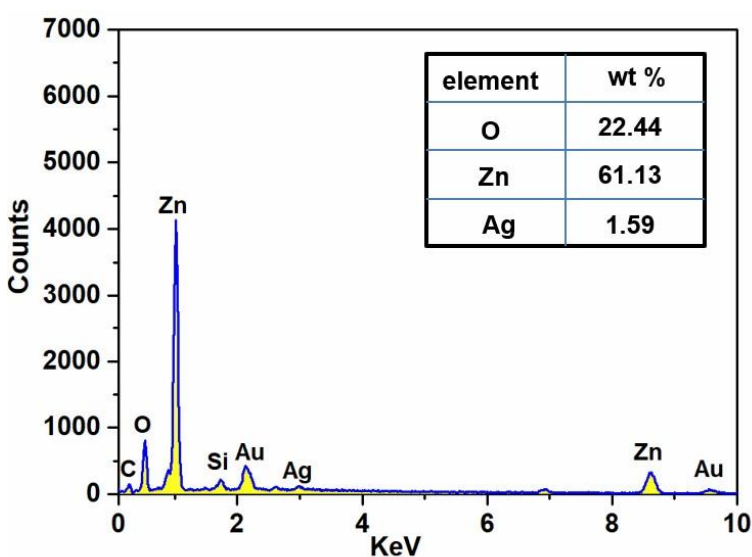

Fig. S2 EDS for different elements as to the ZAC film.

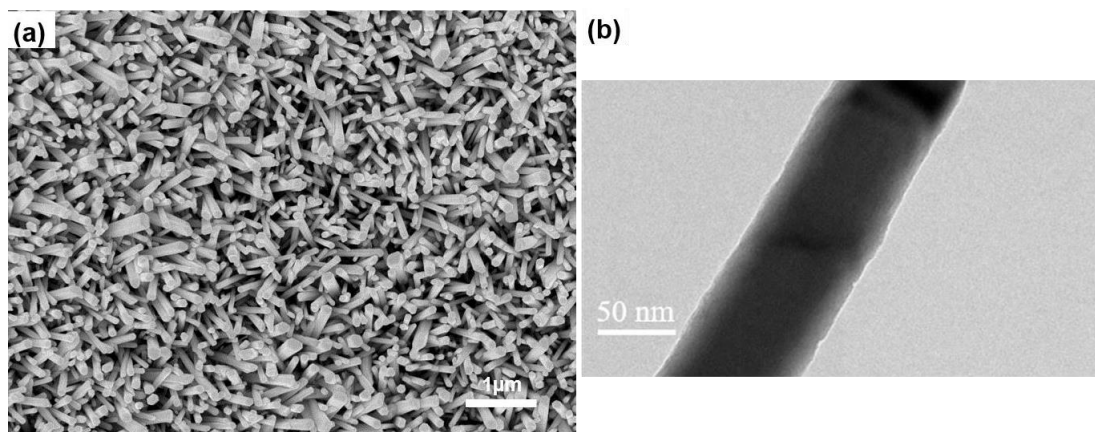

Fig. S3 (a) FESEM and (b) TEM of the sample prepared by the static ZC film in the  $\text{AgNO}_3$  solution (10 mmol/L, 8 mL) without a rotating magnetic field.

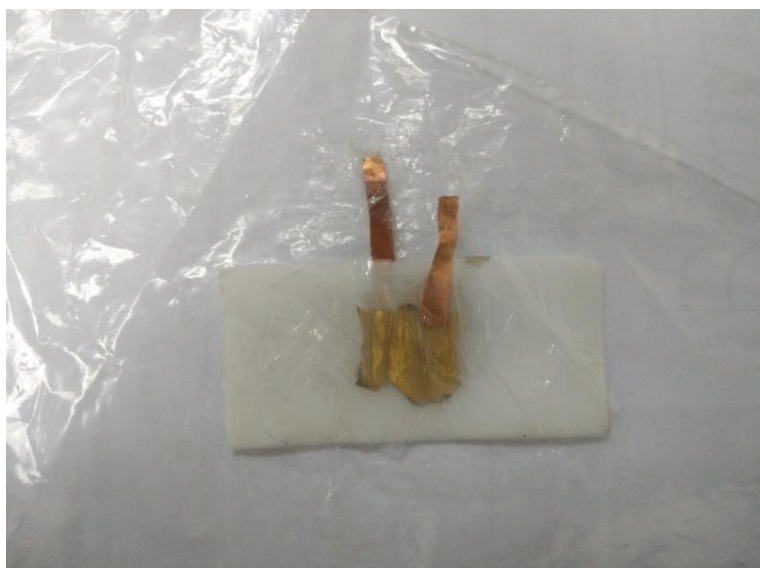

Fig. S4 The pictures of ZnO electrode film.

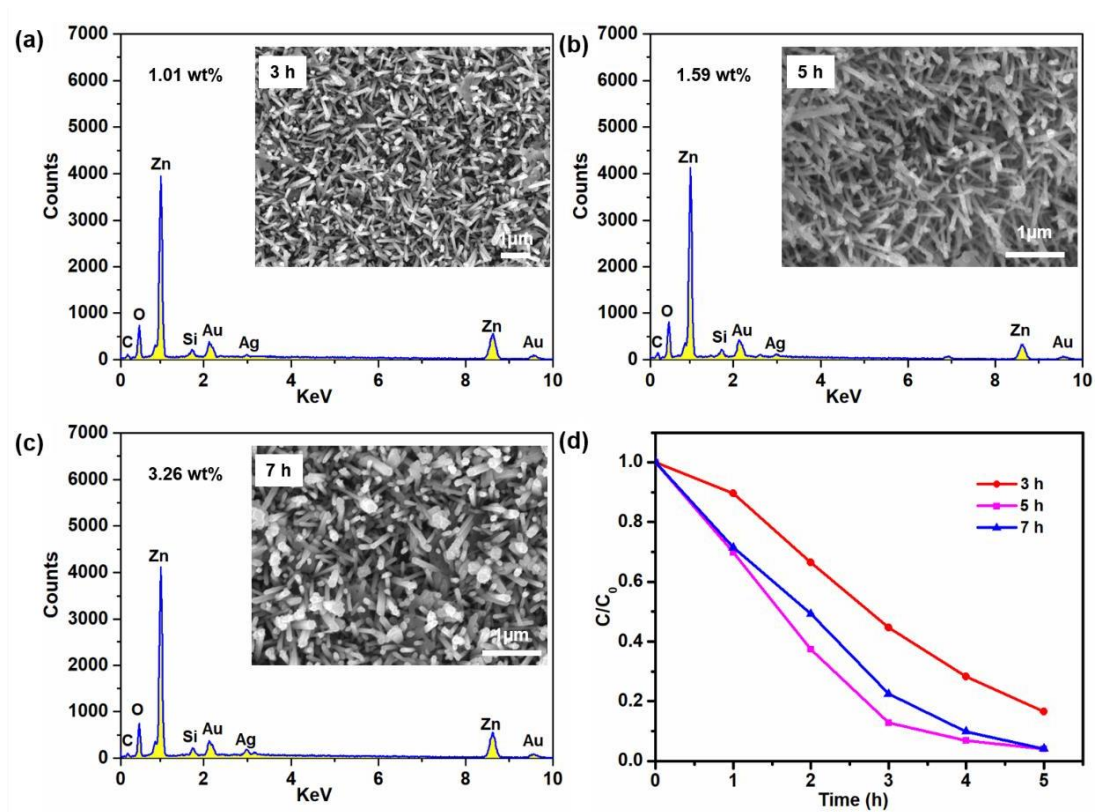

Fig. S5 (a-c) EDS analysis of samples with different piezoelectric deposition time and the inset shows the corresponding FESEM; (d) piezoelectric-catalytic performance of samples with different piezoelectric deposition time.

Table S1. Different catalysts for piezoelectric catalytic degradation of RhB

| Catalysts          | BaTiO <sub>3</sub> powders <sup>1</sup> | MoS <sub>2</sub> nanoflowers <sup>2</sup> | Ag <sub>2</sub> O/BaTiO <sub>3</sub> powers <sup>3</sup> | Bi <sub>2</sub> WO <sub>6</sub> powders <sup>4</sup> | The ZAC film in this manuscript |
|--------------------|-----------------------------------------|-------------------------------------------|----------------------------------------------------------|------------------------------------------------------|---------------------------------|
| Catalytic activity | $C/C_0$ of ~0.2 in 160 min              | $C/C_0$ of ~0.04 in 10 min                | $C/C_0$ of ~0.7 in 180 min                               | $C/C_0$ of ~0.03 in 80 min                           | $C/C_0$ of 0.039 in 5 h         |

## References

1. J. Wu, Q. Xu, E. Lin, B. Yuan, N. Qin, S. K. Thatikonda and D. Bao, *ACS applied materials & interfaces*, 2018, **10**, 17842-17849.
2. J. M. Wu, W. E. Chang, Y. T. Chang and C. K. Chang, *Advanced materials*, 2016, **28**, 3718-3725.
3. H. Li, Y. Sang, S. Chang, X. Huang, Y. Zhang, R. Yang, H. Jiang, H. Liu and Z. L. Wang,

*Nano letters*, 2015, **15**, 2372-2379.

4. Z. Kang, N. Qin, E. Lin, J. Wu, B. Yuan and D. Bao, *Journal of Cleaner Production*, 2020, **261**, 121125.
